# Supplementary material
Source: publisher site journal article supplement (https://www.spandidos-publications.com/2519/downloadSupplementary)
Supplement: Supplementary file 1 [file downloadSupplementary]

## Sheet: Glands number score
Table SI. Exact gastric mucosa thickness and number of inherent glands in the stomach.
Groups	Inherent glands (`x ± s, n=3)
NC	0
AM	1.9±0.1b
L-CP	1.5±0.1b
M-CP	1.1 ±0.1a,b
H-CP	0.5±0.1a
NC, negative control; AM, aging model; L-CP, low-dose Codonopsis pilosula; M-CP, medium-dose Codonopsis pilosula; H-CP, high-dose Codonopsis pilosula. aP<0.05 vs. AM group. bP<0.05 vs. NC group.

## Sheet: Gastric mucosal thickness
Groups	Gastric mucosal thickness (`x ± s, mm, n=3)
NC	846.7±281.3
AM	629.5±36.9
L-CP	827.7±24.9
M-CP	936.9±61.8
H-CP	1155.1±223.6a
NC, negative control; AM, aging model; L-CP, low-dose Codonopsis pilosula; M-CP, medium-dose Codonopsis pilosula; H-CP, high-dose Codonopsis pilosula. aP<0.05 vs. AM group.
